# Supplementary material
Source: ML conference proceedings conference paper supplement (https://openreview.net/forum?id=iZI1vCiTTA)

wise Prob Difference for Model mistralai/Mistral-7B-Instruct-v0.1, Task entailment

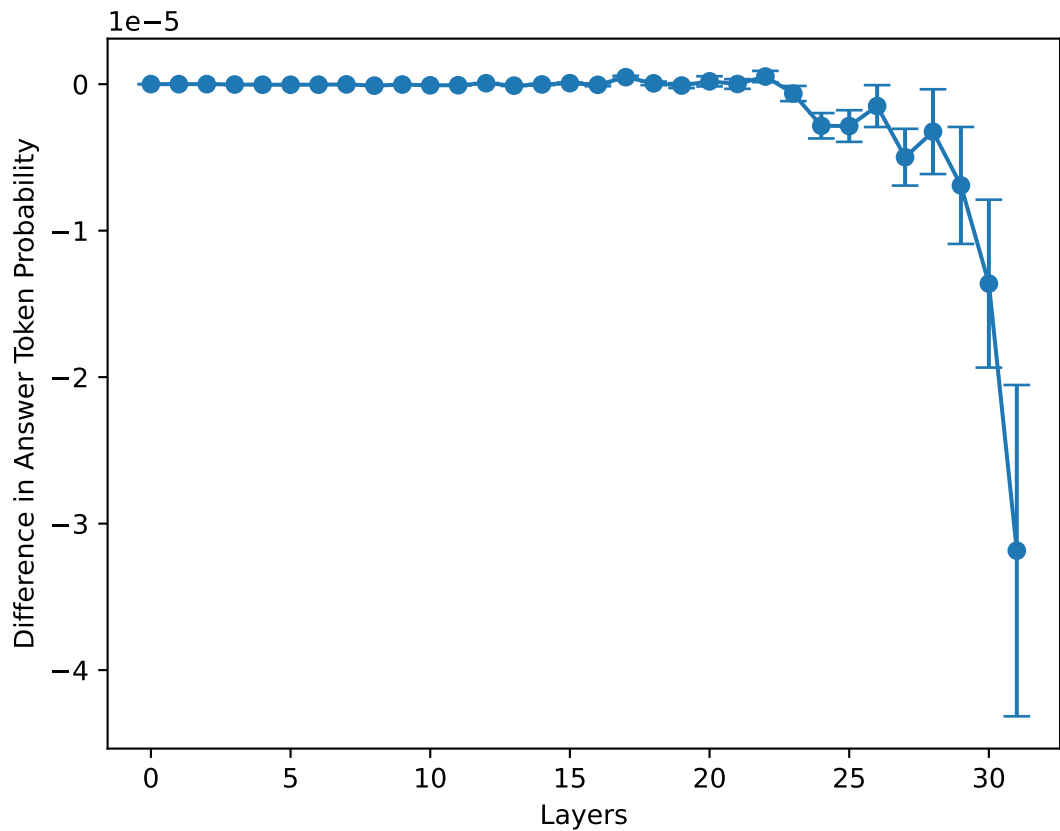

Supplement: supplementary_material [file attachment]

Layer wise Prob Difference for Model Qwen/Qwen2-1.5B-Instruct, Task color

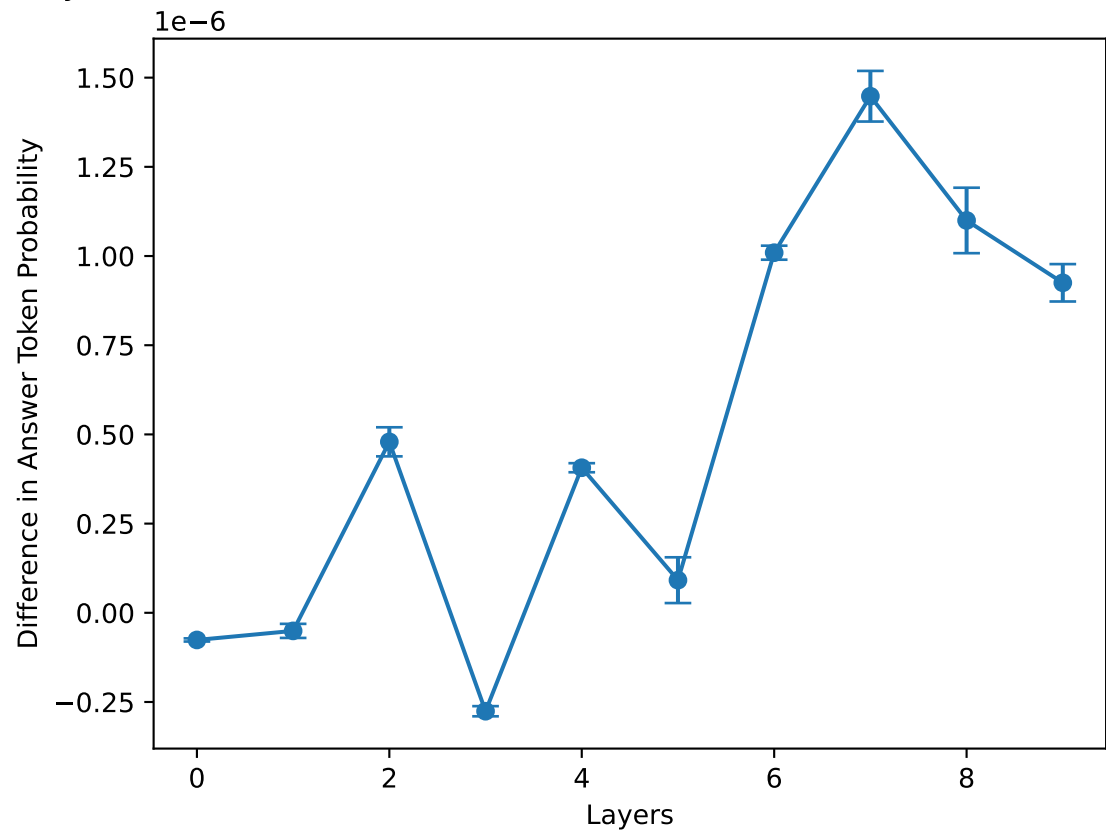

Supplement: supplementary_material [file attachment]

Layer wise Prob Difference for Model mistralai/Mistral-7B-Instruct-v0.1, Task co

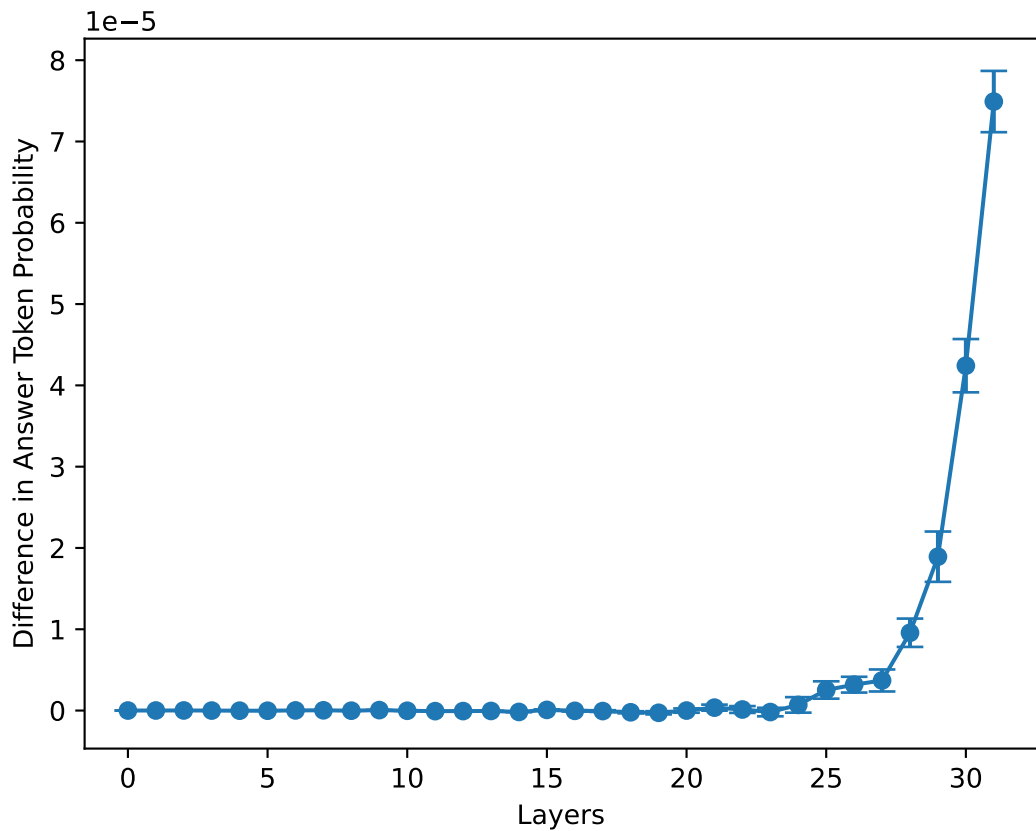

Supplement: supplementary_material [file attachment]

Layer wise Prob Difference for Model Qwen/Qwen2-1.5B-Instruct, Task winow

$1e-6$

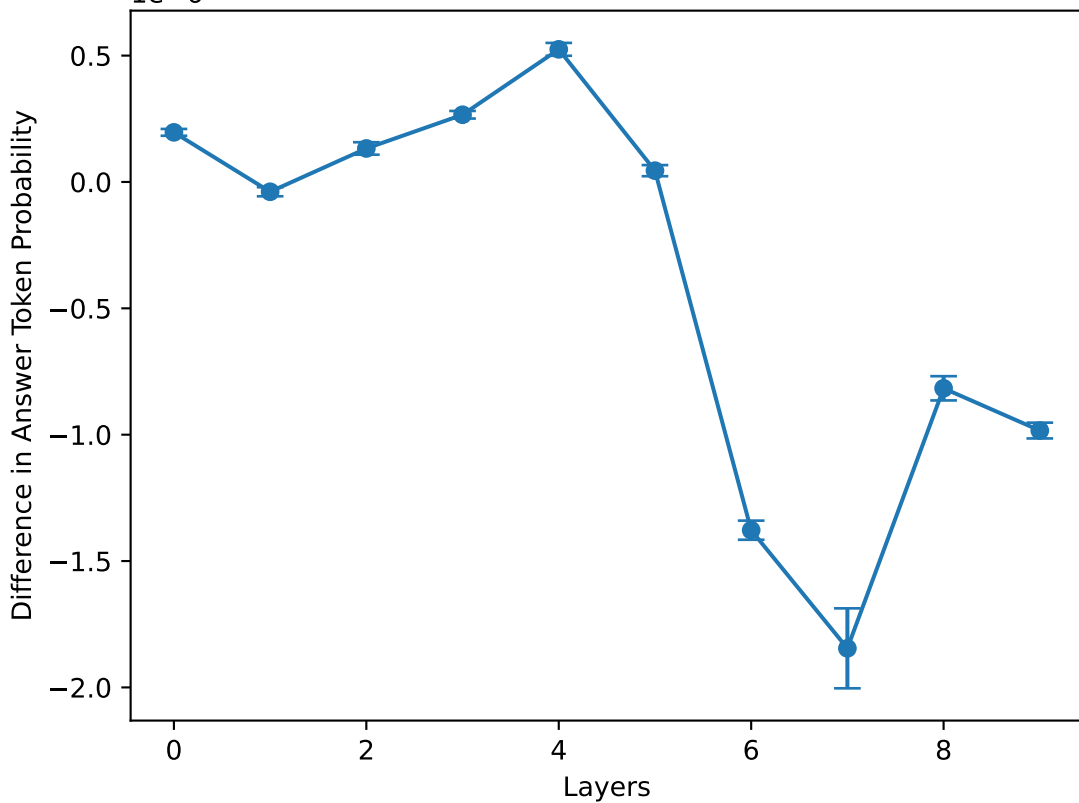

Supplement: supplementary_material [file attachment]

per wise Prob Difference for Model meta-llama/Meta-Llama-3-8B-Instruct, Task

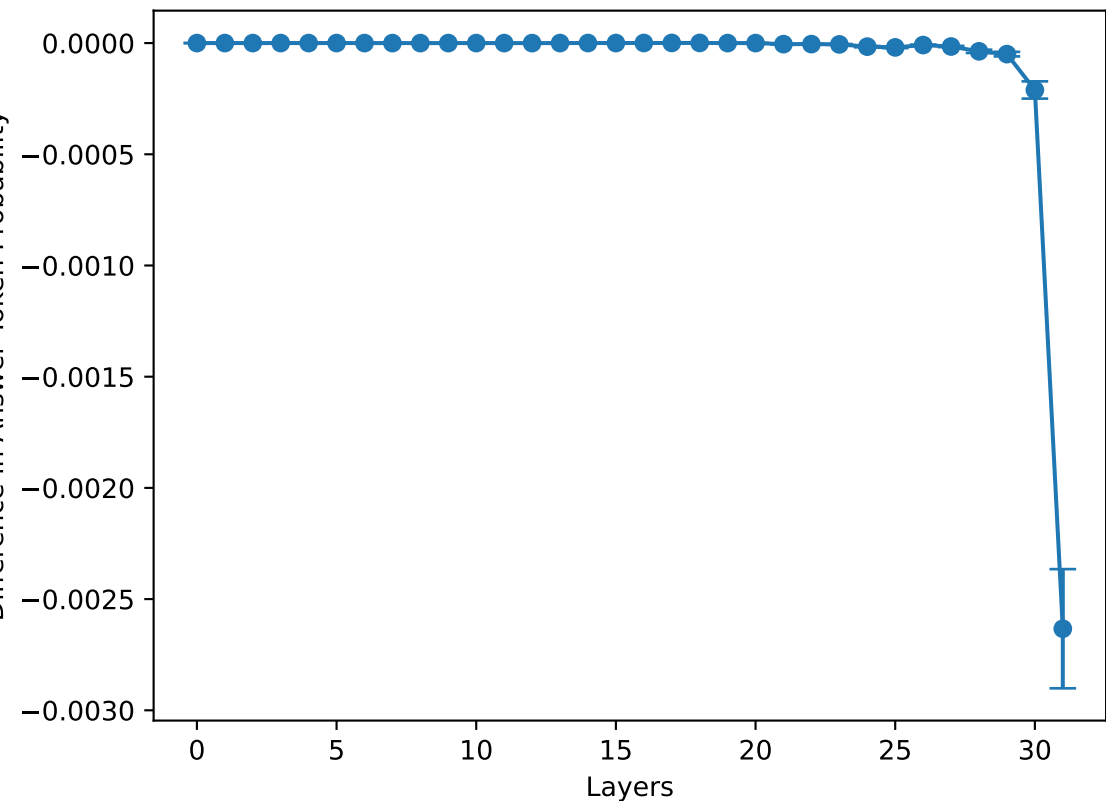

Supplement: supplementary_material [file attachment]

per wise Prob Difference for Model mistralai/Mistral-7B-Instruct-v0.1, Task nav

$1e-5$

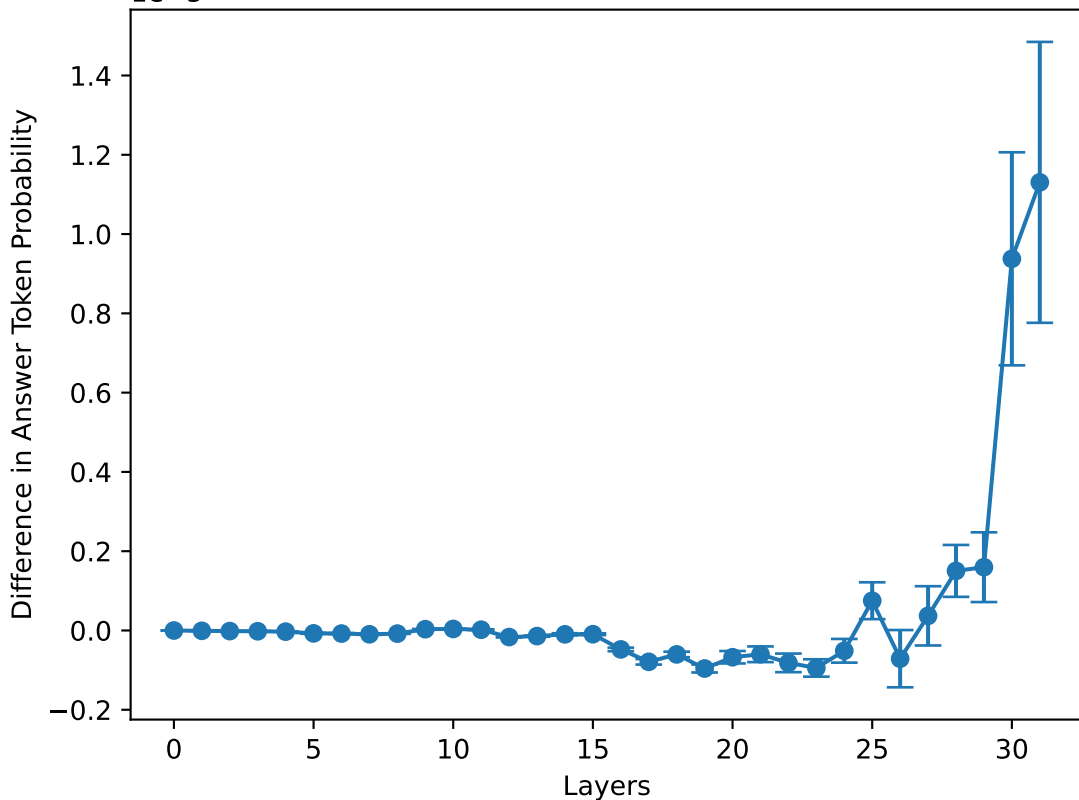

Supplement: supplementary_material [file attachment]

Layer wise Prob Difference for Model microsoft/Phi-3-mini-4k-instruct, Task navigation

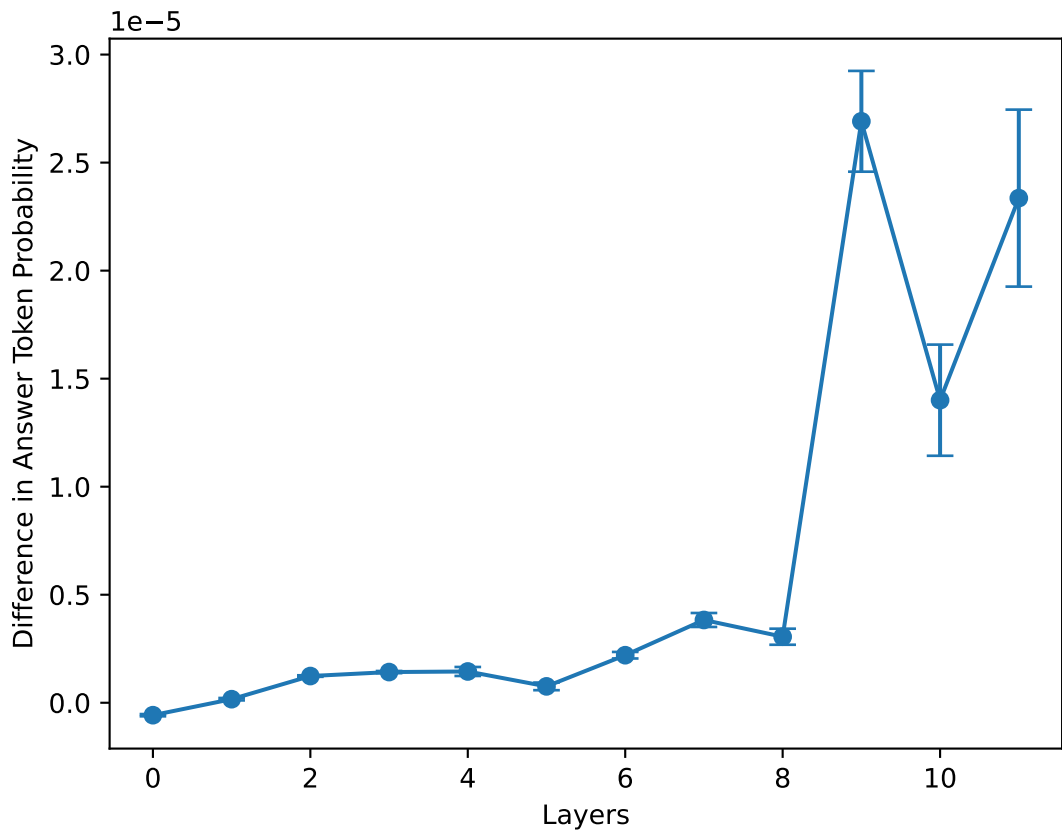

Supplement: supplementary_material [file attachment]

Layer wise Prob Difference for Model Qwen/Qwen2-1.5B-Instruct, Task naviga

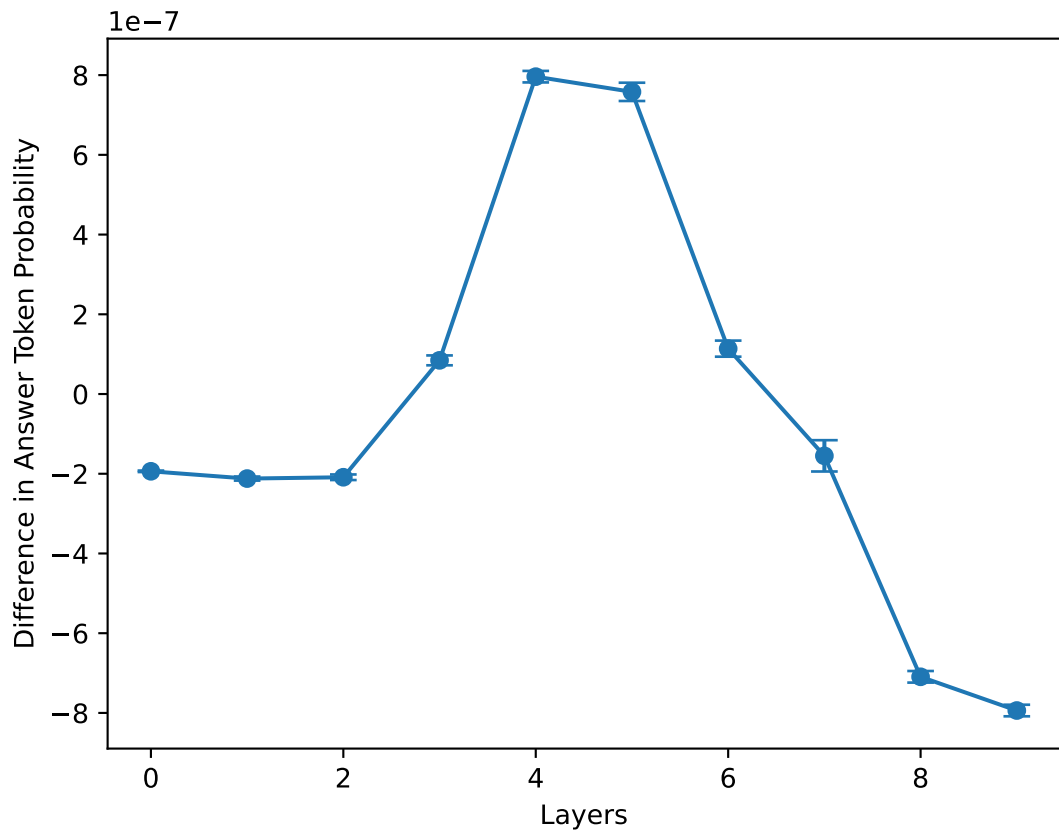

Supplement: supplementary_material [file attachment]

Layer wise Prob Difference for Model microsoft/Phi-3-mini-4k-instruct, Task ag\_n

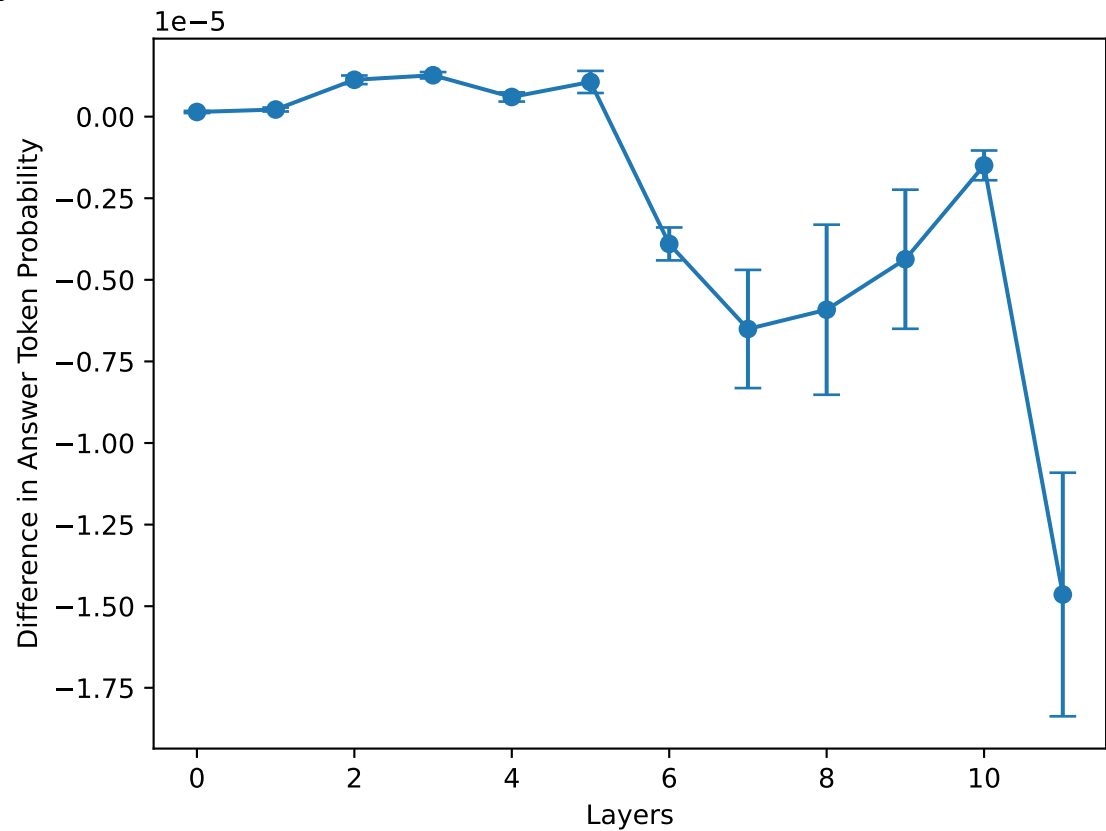

Supplement: supplementary_material [file attachment]

Prob Difference for Model meta-llama/Meta-Llama-3-8B-Instruct, Task entail

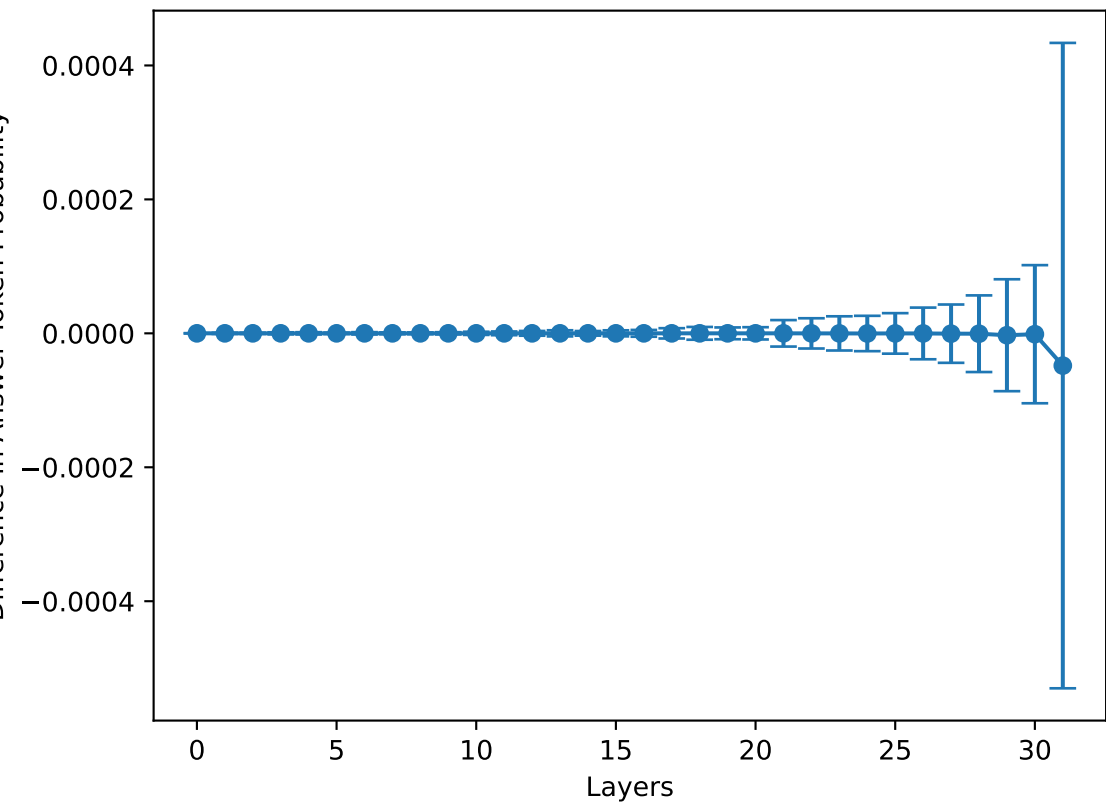

Supplement: supplementary_material [file attachment]

Layer wise Prob Difference for Model microsoft/Phi-3-mini-4k-instruct, Task window

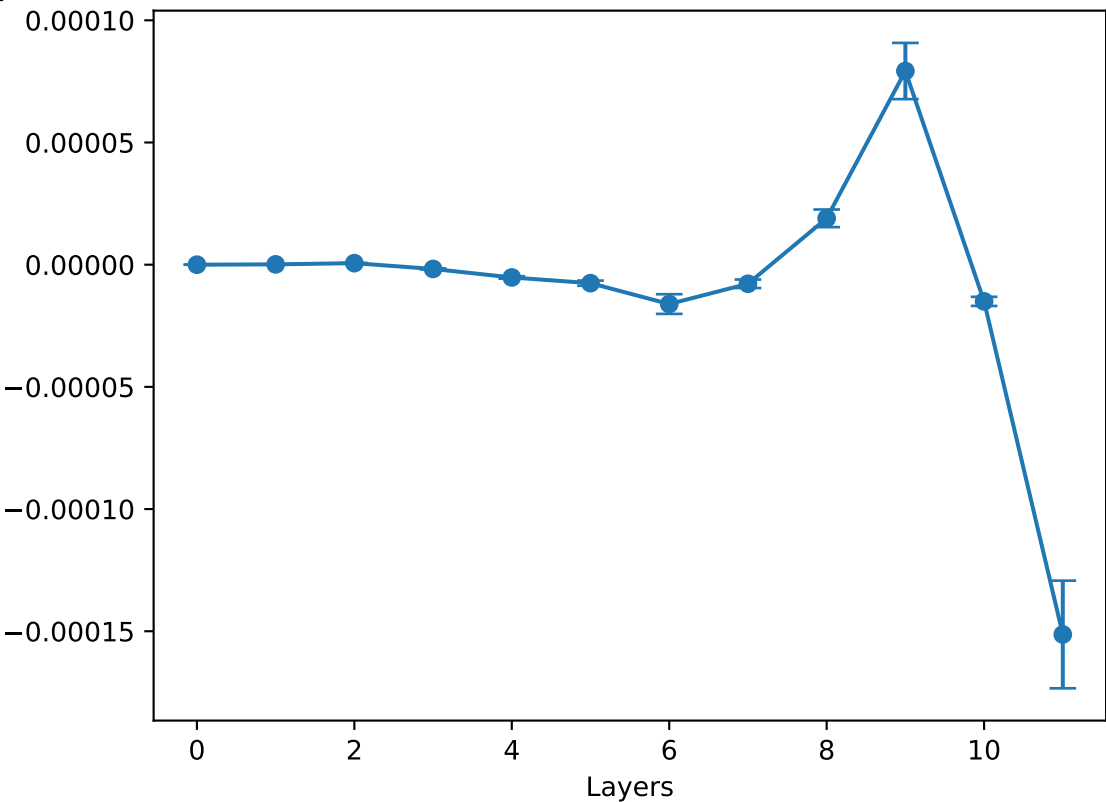

Supplement: supplementary_material [file attachment]

wise Prob Difference for Model meta-llama/Meta-Llama-3-8B-Instruct, Task n

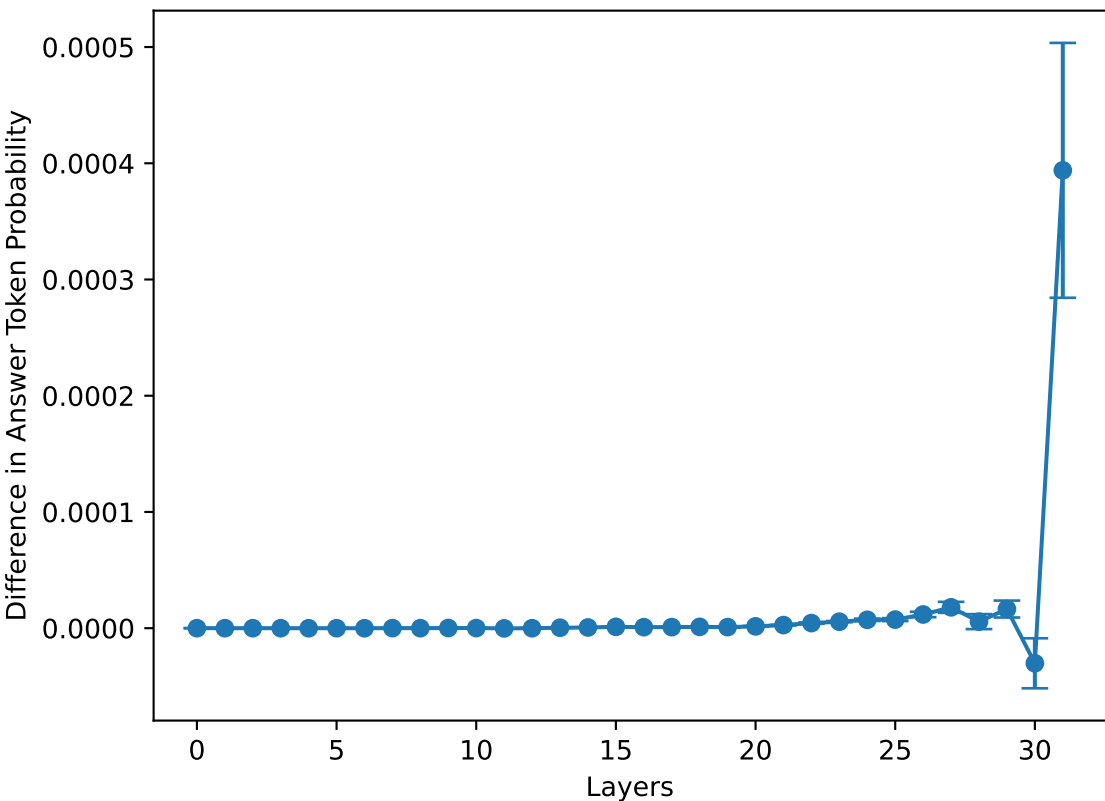

Supplement: supplementary_material [file attachment]

per wise Prob Difference for Model Qwen/Qwen2-1.5B-Instruct, Task entailed\_p

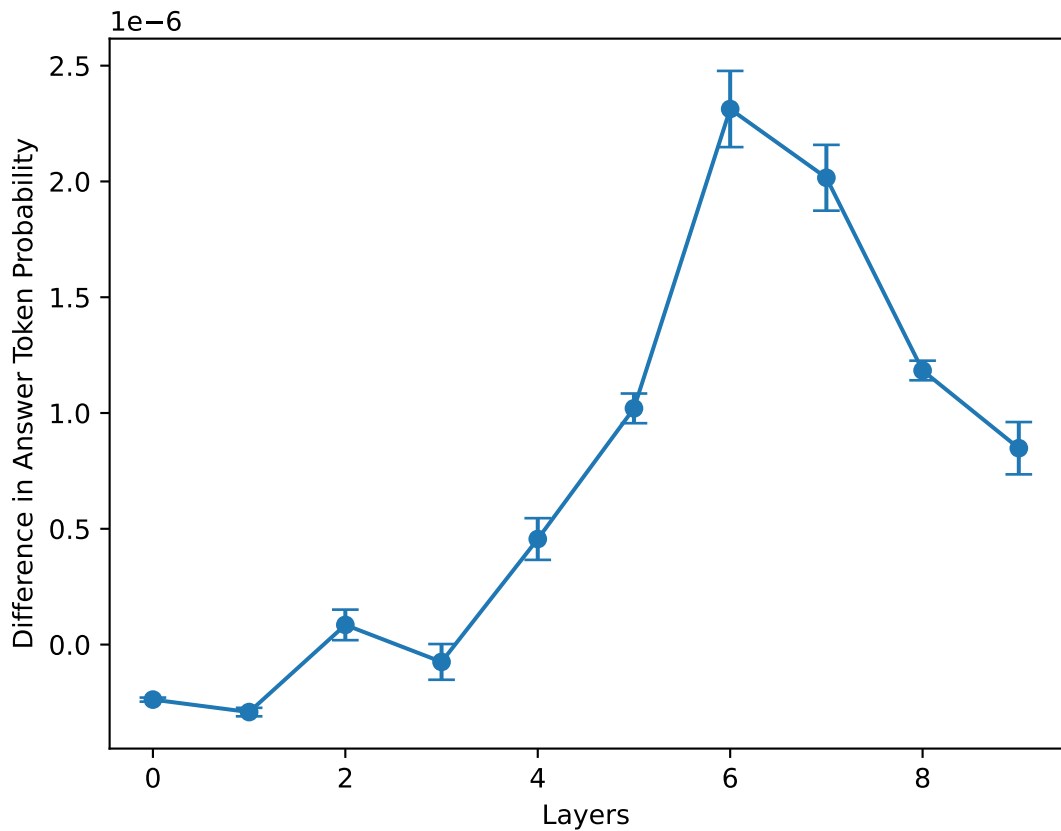

Supplement: supplementary_material [file attachment]

wise Prob Difference for Model meta-llama/Meta-Llama-3-8B-Instruct, Task a

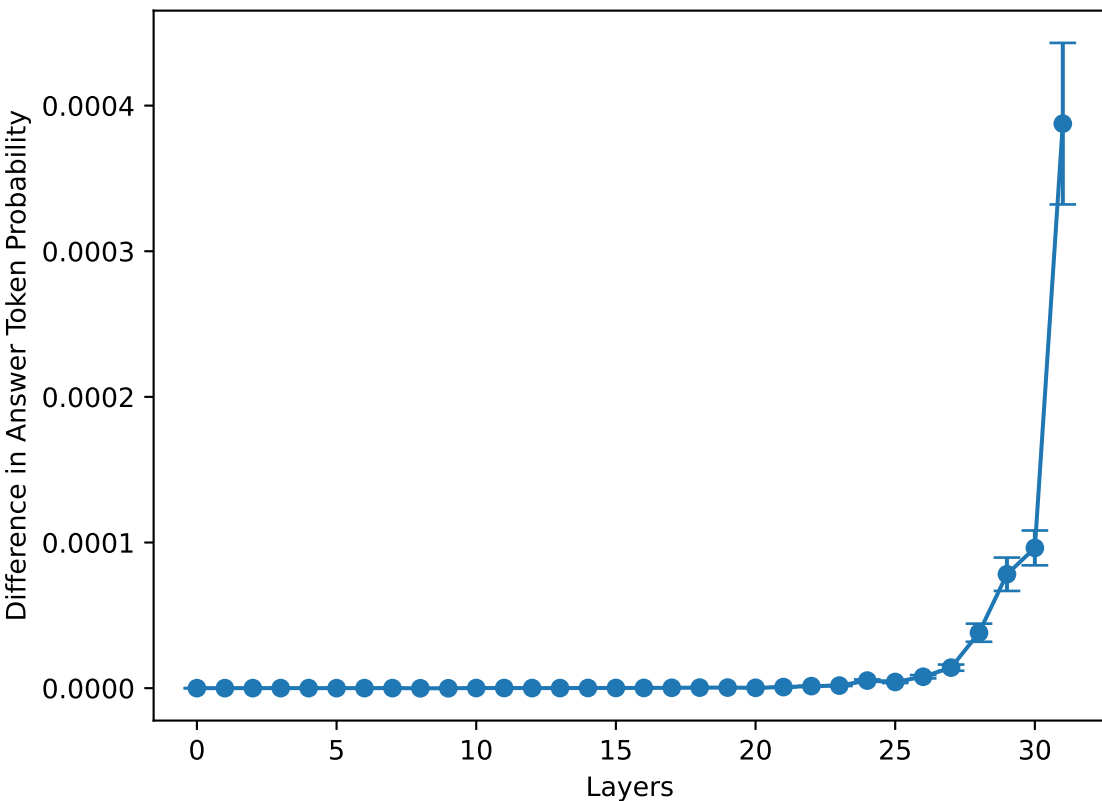

Supplement: supplementary_material [file attachment]

Layer wise Prob Difference for Model Qwen/Qwen2-1.5B-Instruct, Task ag\_new

$1e-6$

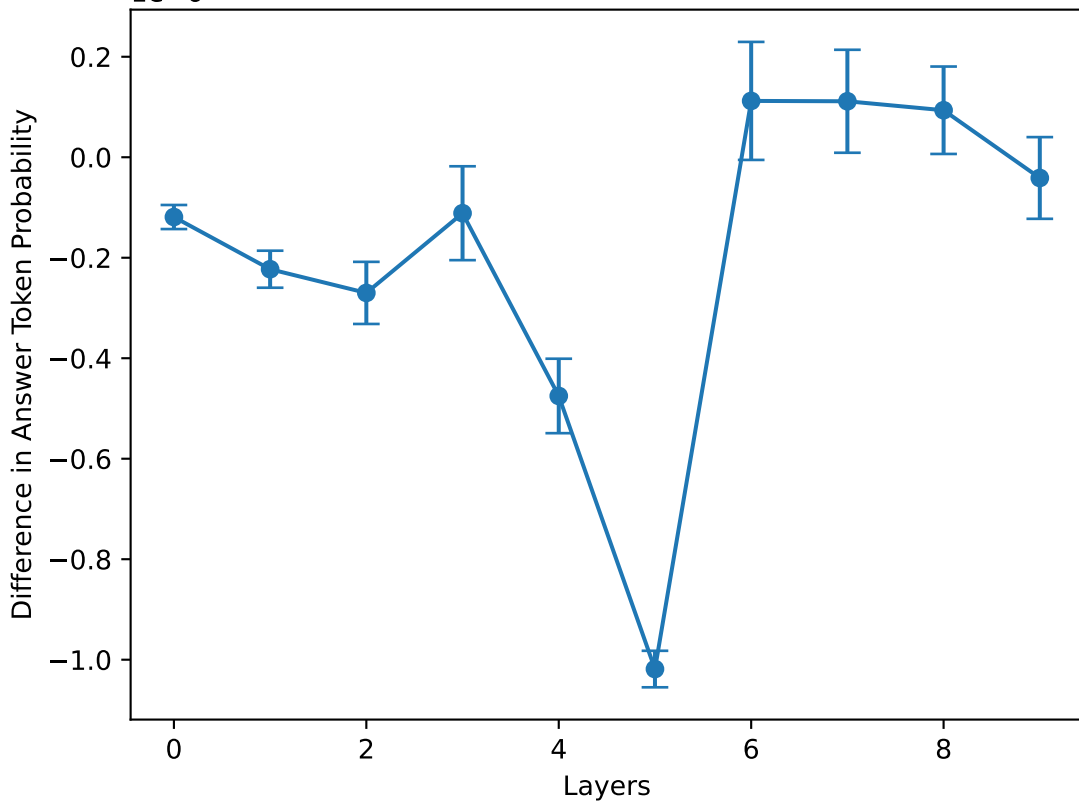

Supplement: supplementary_material [file attachment]

per wise Prob Difference for Model mistralai/Mistral-7B-Instruct-v0.1, Task win

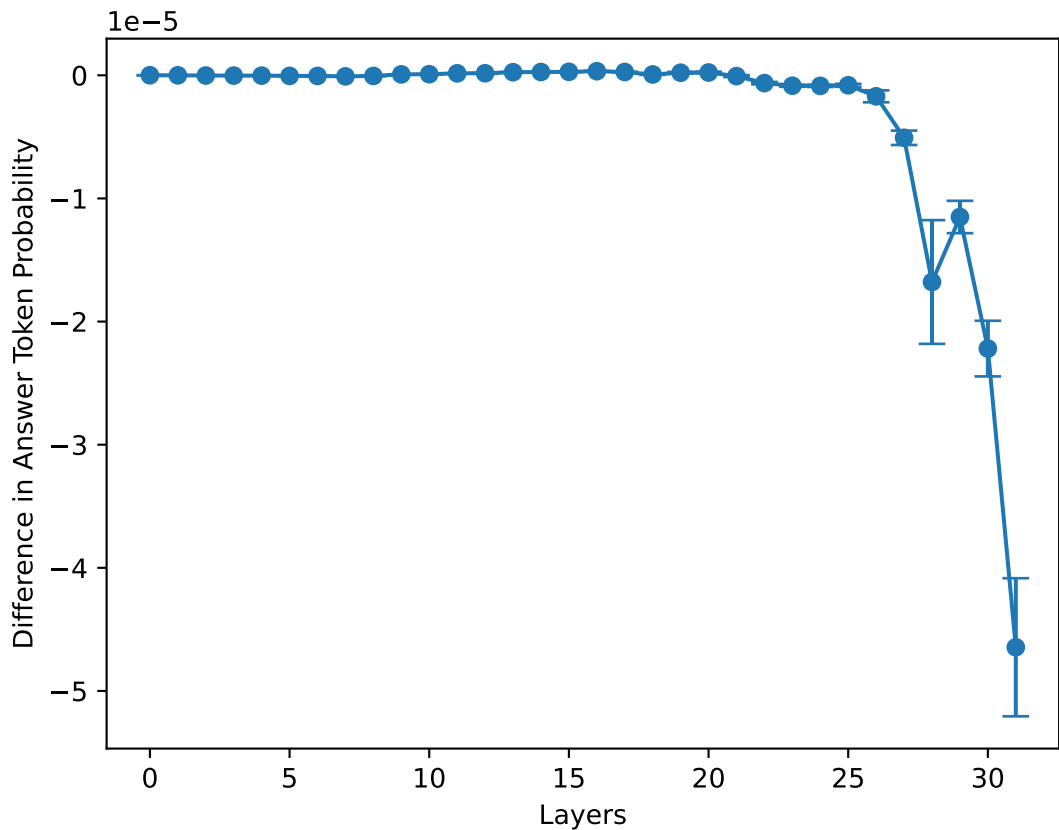

Supplement: supplementary_material [file attachment]

per wise Prob Difference for Model mistralai/Mistral-7B-Instruct-v0.1, Task ag\_

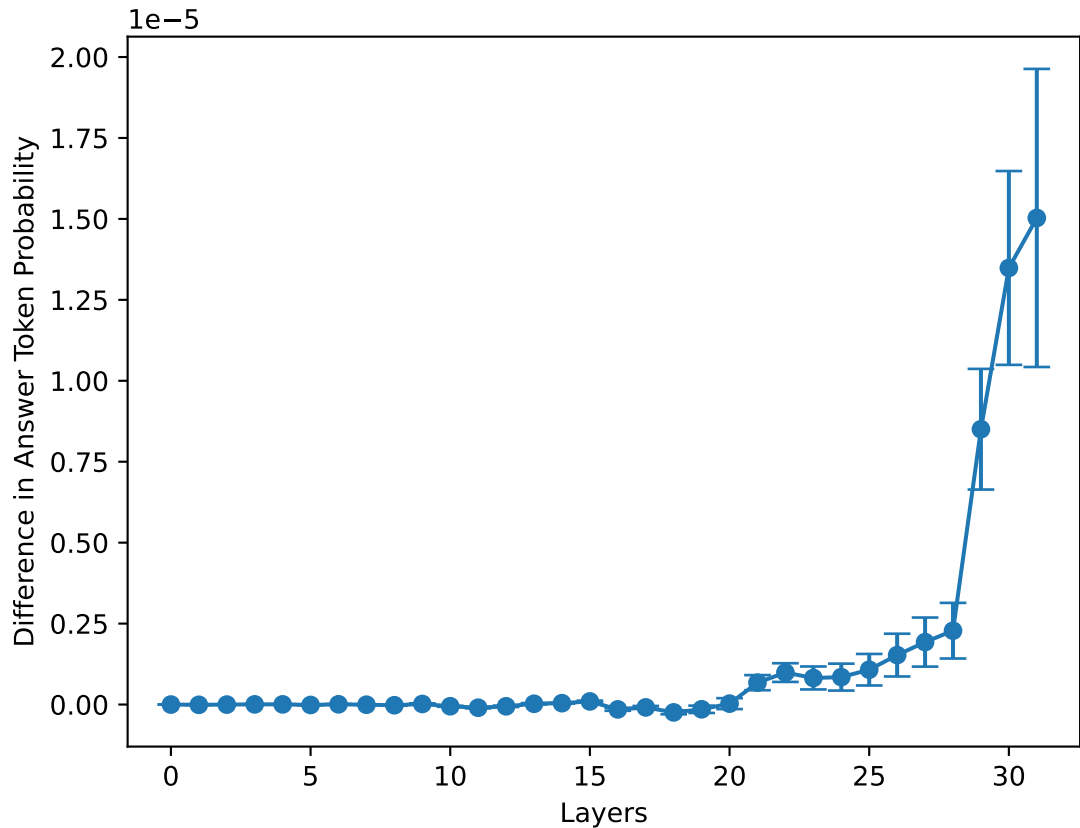

Supplement: supplementary_material [file attachment]
